# Supplementary material for: Meta-Analysis and Systematic Review of Neural Stem Cells therapy for experimental ischemia stroke in preclinical studies
Source: PubMed Central journal article supplement (PMC4995377; doi:10.1038/srep32291), 2016-08-24
Supplement: srep32291-s1.pdf [file srep32291-s1.pdf]

## Online Supplements

# Meta-Analysis and Systematic Review of Neural Stem Cells therapy for experimental ischemia stroke in preclinical studies

Lukui Chen<sup>1\*†</sup>, Guilong Zhang<sup>1†</sup>, Yuchun Gu<sup>2</sup>, Xiaoyuan Guo<sup>1</sup>

<sup>1</sup>Department of Neurosurgery, Zhongda Hospital, School of Medicine, Southeast University,  
Nanjing, China

<sup>2</sup>Molecular Pharmacology Laboratory, Institute of Molecular Medicine, Peking University, Beijing,  
100871, China

†These two authors have contributed equally to this study.

\*Corresponding Author:

Lukui Chen, Department of Neurosurgery, Zhongda Hospital Southeast University, 87 Dingjiaqiao,

Gulou District, Nanjing, 210009, China; Tel: 86-25-83262271; Fax: 86-25-83272011;

Email: neuro\_clk@hotmail.com

# Supplementary Fig. 1 Effect sizes of all studies (no excluded)

## A. Neurobehavioural Effect Size

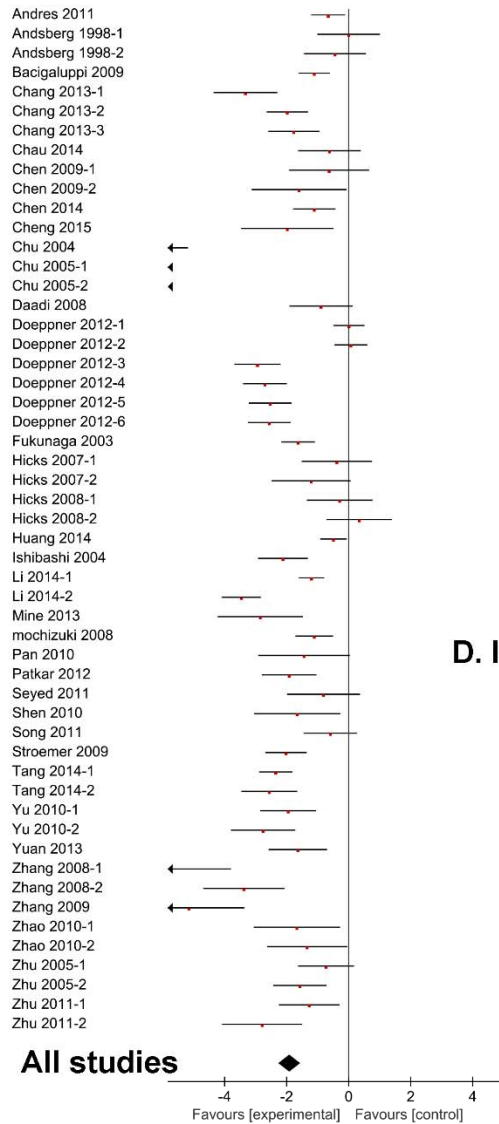

## B. mNSS Effect Size

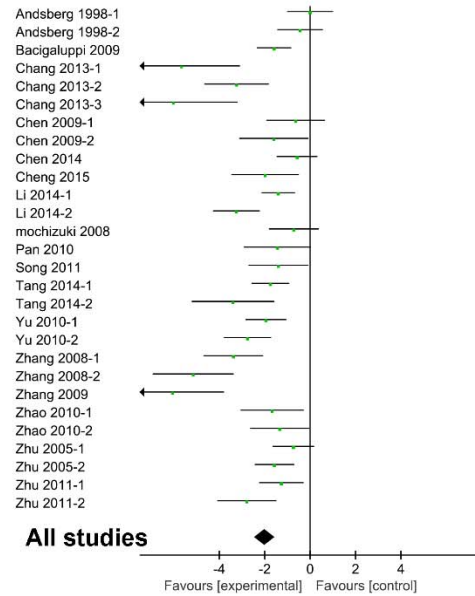

## D. Infarct Volume Effect Size

### 0-1 day poststroke

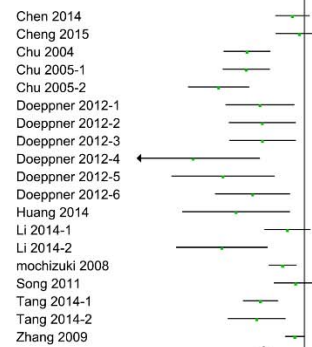

### 1-3 day poststroke

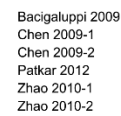

### >3 day poststroke

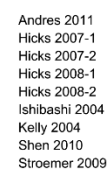

## C. Rotarod test Effect Size

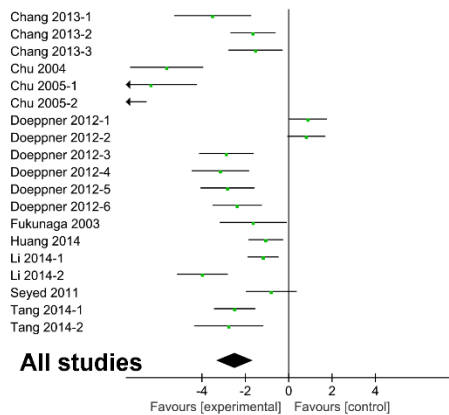

### Supplementary Table 1 Search Strategy (Take PubMed for instance)

---

**Search** (((((((("Brain Ischemia"[Mesh]) OR ((brain ischaemia[Title/Abstract] OR stroke\*[Title/Abstract] OR cerebrovascular stroke[Title/Abstract] OR apoplexy[Title/Abstract] OR cerebral stroke[Title/Abstract] OR cerebrovascular accident[Title/Abstract] OR acute cerebrovascular accident[Title/Abstract] OR cerebrovascular apoplexy[Title/Abstract] OR acute stroke[Title/Abstract] OR ischemic stroke[Title/Abstract] OR ischaemic stroke[Title/Abstract] OR acute ischemic stroke[Title/Abstract] OR acute ischaemic stroke[Title/Abstract] OR vascular brain accident[Title/Abstract] OR middle cerebral artery[Title/Abstract] OR middle cerebral artery infarction[Title/Abstract] OR middle cerebral artery occlusion[Title/Abstract] OR MCA occlusion[Title/Abstract] OR MCA[Title/Abstract] OR MCAO[Title/Abstract] OR anterior cerebral artery[Title/Abstract] OR ACA[Title/Abstract] OR anterior cerebral artery occlusion[Title/Abstract] OR ACAO[Title/Abstract] OR focal cerebral ischemia[Title/Abstract] OR focal ischemia[Title/Abstract]))) AND ("Neural Stem Cells"[Mesh]) OR ((neural stem\*[Title/Abstract] OR NSC\*[Title/Abstract] OR neural precursor cells[Title/Abstract] OR neural precursor\*[Title/Abstract] OR NPC\*[Title/Abstract] OR nerve stem cell\*[Title/Abstract] OR neuronal stem cell\*[Title/Abstract]))) AND ((animals[MeSH Terms]) OR ((mammals[Title/Abstract] OR primates [Title/Abstract] OR mice[Title/Abstract] OR Rats[Title/Abstract] OR Mouse[Title/Abstract]))) NOT (((heart[Title/Abstract] OR bone[Title/Abstract] OR eye[Title/Abstract] OR lung[Title/Abstract] OR kidney[Title/Abstract] OR liver[Title/Abstract] OR renal[Title/Abstract] OR intestine\*[Title/Abstract] OR spinal[Title/Abstract] OR pulmonary[Title/Abstract] OR hepatic[Title/Abstract] OR global[Title/Abstract]))) OR ((coronary[Title/Abstract] OR myocardial[Title/Abstract]))) NOT ((AD[Title/Abstract] OR PD[Title/Abstract] OR Alzheimer\*[Title/Abstract] OR Parkinson\* [Title/Abstract] OR epilepsy[Title/Abstract] OR MS[Title/Abstract] OR Multiple Sclerosis[Title/Abstract]))

---

**Supplementary Fig. 2 Flow diagram showing summary of study selection procedure**

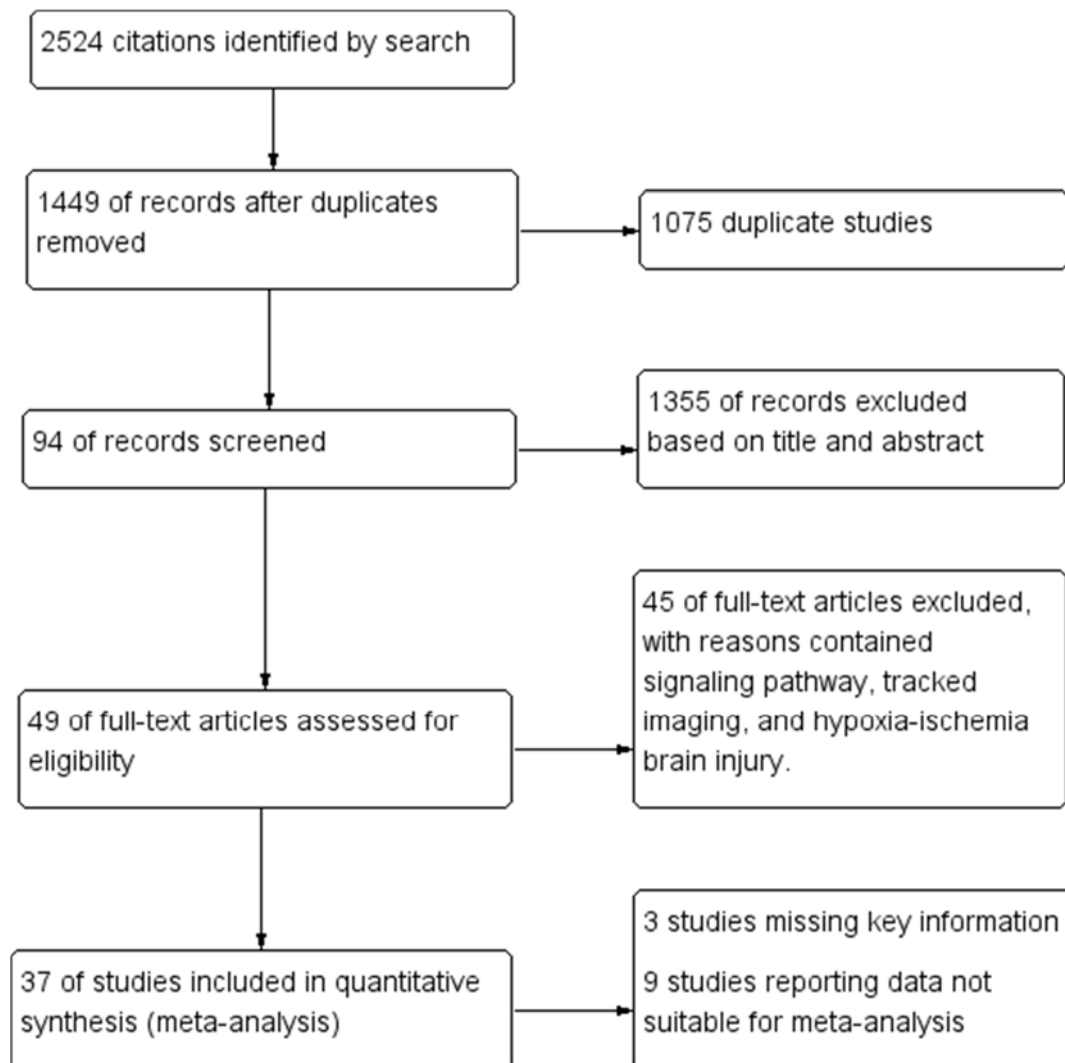

**Supplementary Table 2 Study Characteristic Report**

| <b>Author</b>               | <b>Year</b> | <b>Intervention</b> | <b>Species</b> | <b>Type of Cerebral Ischemia</b> | <b>No. of Animals</b> | <b>Dose Range(cells)</b> | <b>Time of Admin(min)</b> | <b>Route of Delivery</b> | <b>Anaesthetic</b> |
|-----------------------------|-------------|---------------------|----------------|----------------------------------|-----------------------|--------------------------|---------------------------|--------------------------|--------------------|
| Andsberg G <sup>1</sup>     | 1998-1      | rat NSC             | Rat            | Transient MCAO                   | 10                    | 900000                   | -10080                    | Stereotactic             | Halothane          |
|                             | 1998-2      | rat NGF-NSC         | Rat            | Transient MCAO                   | 10                    | 900000                   | -10080                    | Stereotactic             | Halothane          |
| Fukunaga A <sup>2</sup>     | 2003        | rat NSC             | Rat            | Transient MCAO                   | 5                     | 55000                    | 30240                     | Stereotactic             | Halothane          |
| Chu K <sup>3</sup>          | 2004        | human NSC           | Rat            | Transient MCAO                   | 30                    | 5000000                  | 1440                      | tail vein                | none               |
| Ishibashi S <sup>4</sup>    | 2004        | human NSPC          | Gerbil         | Transient MCAO                   | 7                     | 500000                   | 5760                      | Stereotactic             | Isoflurane         |
| Kelly S <sup>5</sup>        | 2004        | human NSC           | Rat            | Transient MCAO                   | 13                    | 300000                   | 10080                     | Stereotactic             | Isoflurane         |
| Chu K <sup>6</sup>          | 2005-1      | human NSC           | Rat            | Transient MCAO                   | 12                    | 5000000                  | 1440                      | tail vein                | none               |
|                             | 2005-2      | hNSC-VEGF           | Rat            | Transient MCAO                   | 12                    | 5000000                  | 1440                      | tail vein                | none               |
| Zhu W <sup>7</sup>          | 2005        | rat NSC             | Rat            | Transient MCAO                   | 10                    | 200000                   | 4320                      | Stereotactic             | ketamine           |
|                             | 2005        | rat NSC-VEGF        | Rat            | Transient MCAO                   | 10                    | 200000                   | 4320                      | Stereotactic             | ketamine           |
| Hicks A <sup>8</sup>        | 2007-1      | mouse NSC-ST        | Rat            | Transient MCAO                   | 10                    | 800000                   | 10080                     | Stereotactic             | Isoflurane         |
|                             | 2007-2      | mouse NSC-EE        | Rat            | Transient MCAO                   | 15                    | 800000                   | 10080                     | Stereotactic             | Isoflurane         |
| Daadi M <sup>9</sup>        | 2008        | Human ESC-NSC       | Rat            | Transient MCAO                   | 10                    | 100000                   | 10080                     | Stereotactic             | Unknown            |
| Hicks A <sup>10</sup>       | 2008-1      | mouse NSC-ST        | Rat            | Transient MCAO                   | 13                    | 800000                   | 10080                     | Stereotactic             | Isoflurane         |
|                             | 2008-2      | mouse NSC-EE        | Rat            | Transient MCAO                   | 13                    | 800000                   | 10080                     | Stereotactic             | Isoflurane         |
| Mochizuki N <sup>11</sup>   | 2008        | rat NPC             | Rat            | Thrombotic                       | 17                    | 100000                   | unknow                    | Stereotactic             | Pentobarbital      |
| Zhang Z <sup>12</sup>       | 2008-1      | rat NSC             | Rat            | Transient MCAO                   | 12                    | 200000                   | 10080                     | Stereotactic             | Chloral Hydrate    |
|                             | 2008-2      | rat NSC-hNT3        | Rat            | Transient MCAO                   | 12                    | 200000                   | 10080                     | Stereotactic             | Chloral Hydrate    |
| Bacigaluppi M <sup>13</sup> | 2009        | mouse NSC           | mice           | Transient MCAO                   | 18                    | 1000000                  | 4320                      | tail vein                | none               |
| Chen B <sup>14</sup>        | 2009-1      | rat NSC             | Rat            | Transient MCAO                   | 10                    | 500000                   | 4320                      | Stereotactic             | Pentobarbital      |
|                             | 2009-2      | rat NSC-GDNF        | Rat            | Transient MCAO                   | 10                    | 500000                   | 4320                      | Stereotactic             | Pentobarbital      |

| <b>Author</b>            | <b>Year</b> | <b>Intervention</b> | <b>Species</b> | <b>Type of Cerebral Ischemia</b> | <b>No. of Animals</b> | <b>Dose Range(cells)</b> | <b>Time of Admin(min)</b> | <b>Route of Delivery</b> | <b>Anaesthetic</b> |
|--------------------------|-------------|---------------------|----------------|----------------------------------|-----------------------|--------------------------|---------------------------|--------------------------|--------------------|
| Stroemer P <sup>15</sup> | 2009        | human NSC           | Rat            | Transient MCAO                   | 10                    | 450000                   | 40320                     | Stereotactic             | halothane          |
| Zhang P <sup>16</sup>    | 2009        | human NSC           | Rat            | Permanent                        | 30                    | 50000                    | 1440                      | Stereotactic             | Pentobarbital      |
| Pan <sup>17</sup>        | 2010        | hNSC                | Rat            | Transient MCAO                   | 20                    | 3000000                  | 1440                      | Stereotactic             | Unknown            |
| Shen C <sup>18</sup>     | 2010        | rat NSC             | Rat            | Transient MCAO                   | 12                    | 10000000                 | 20160                     | femoral veins            | Isoflurane         |
| Yu H <sup>19</sup>       | 2010-1      | rat NSC             | Rat            | Transient MCAO                   | 18                    | 15000                    | 1440                      | Stereotactic             | Chloral Hydrate    |
|                          | 2010-2      | rat NSC-coll        | Rat            | Transient MCAO                   | 18                    | 15000                    | 1440                      | Stereotactic             | Chloral Hydrate    |
| Zhao Y <sup>20</sup>     | 2010-1      | rat NSC             | Rat            | Transient MCAO                   | 12                    | 50000                    | 2880                      | Stereotactic             | ketamine           |
|                          | 2010-2      | rat NSC-wort        | Rat            | Transient MCAO                   | 12                    | 50000                    | 2880                      | Stereotactic             | ketamine           |
| Andres R <sup>21</sup>   | 2011        | human NSC           | nude rat       | Permanent                        | 12                    | 300000                   | 10080                     | Stereotactic             | Isoflurane         |
| Seyed J <sup>22</sup>    | 2011        | rat NSC             | Rat            | Transient MCAO                   | 8                     | 10000000                 | 4320                      | lumbar puncture          | Chloral Hydrate    |
| Song M <sup>23</sup>     | 2011        | human NSC           | Rat            | Transient MCAO                   | 6                     | 4000000                  | 1440                      | tail vein                | none               |
| Zhu J <sup>24</sup>      | 2011-1      | rat NSC             | Rat            | Transient MCAO                   | 10                    | 1000000                  | 4320                      | Stereotactic             | Chloral Hydrate    |
|                          | 2011-2      | rat NSC-BDNF        | Rat            | Transient MCAO                   | 20                    | 1000000                  | 4320                      | Stereotactic             | Chloral Hydrate    |
| Doeppner T <sup>25</sup> | 2012-1      | mouse NSC-ic        | mice           | Transient MCAO                   | 14                    | 500000                   | 360                       | Stereotactic             | ketamine           |
|                          | 2012-2      | mouse NSC-ic-TAT-HA | mice           | Transient MCAO                   | 14                    | 500000                   | 360                       | Stereotactic             | ketamine           |
|                          | 2012-3      | mouse NSC-ic-TAT-HS | mice           | Transient MCAO                   | 14                    | 500000                   | 360                       | Stereotactic             | ketamine           |
|                          | 2012-4      | mouse NSC-iv        | mice           | Transient MCAO                   | 14                    | 1000000                  | 360                       | femoral vein             | none               |
|                          | 2012-5      | mouse NSC-iv-TAT-HA | mice           | Transient MCAO                   | 14                    | 1000000                  | 360                       | femoral vein             | none               |
|                          | 2012-6      | mouse NSC-ivTAT-HS  | mice           | Transient MCAO                   | 14                    | 1000000                  | 360                       | femoral vein             | none               |
| Patkar S <sup>26</sup>   | 2012        | mouse NSC           | mice           | Transient MCAO                   | 8                     | 50000                    | 2880                      | Stereotactic             | Isoflurane         |
| Chang D J <sup>27</sup>  | 2013-1      | hNSC-BDNF           | Rat            | Transient MCAO                   | 8                     | 400000                   | 10080                     | Stereotactic             | Unknown            |
| Chang D J <sup>28</sup>  | 2013-2      | hipsc-NPC           | Rat            | Transient MCAO                   | 10                    | 200000                   | 10080                     | Stereotactic             | Unknown            |
| Chang D J <sup>29</sup>  | 2013-3      | hESC-NPC            | Rat            | Transient MCAO                   | 8                     | 200000                   | 10080                     | Stereotactic             | ketamine           |

| <b>Author</b>          | <b>Year</b> | <b>Intervention</b> | <b>Species</b> | <b>Type of Cerebral Ischemia</b> | <b>No. of Animals</b> | <b>Dose Range(cells)</b> | <b>Time of Admin(min)</b> | <b>Route of Delivery</b> | <b>Anaesthetic</b> |
|------------------------|-------------|---------------------|----------------|----------------------------------|-----------------------|--------------------------|---------------------------|--------------------------|--------------------|
| Mine Y <sup>30</sup>   | 2013        | hNPSC               | nude rat       | Transient MCAO                   | 18                    | 200000                   | 2880                      | Stereotactic             | Isoflurane         |
| Yuan T <sup>31</sup>   | 2013        | hipsc-NPC           | Rat            | Transient MCAO                   | 5                     | 1000000                  | unknow                    | Stereotactic             | Unknown            |
| Chau M J <sup>32</sup> | 2014        | mouse-ips-NPC       | Rat            | Permanent                        | 24                    | 400000                   | 10080                     | Stereotactic             | Chloral Hydrate    |
| Chen L <sup>33</sup>   | 2014        | rat NSC             | rat            | Transient MCAO                   | 10                    | 80000                    | 1440                      | Stereotactic             | Chloral Hydrate    |
| Huang L <sup>34</sup>  | 2014        | hNSC                | mice           | Transient MCAO                   | 18                    | 100000                   | 1440                      | Stereotactic             | Isoflurane         |
| Li J <sup>35</sup>     | 2014-1      | mouse NSC-irrFCs    | Rat            | Transient MCAO                   | 18                    | 1000000                  | 1440                      | Stereotactic             | Unknown            |
|                        | 2014-2      | mouse NSC-VPC       | Rat            | Transient MCAO                   | 18                    | 1000000                  | 1440                      | Stereotactic             | Unknown            |
| Tang Y <sup>36</sup>   | 2014-1      | mice NSC            | Rat-Y          | Transient MCAO                   | 16                    | 1000000                  | 1440                      | Stereotactic             | ketamine           |
|                        | 2014-2      | mice NSC            | Rat-A          | Transient MCAO                   | 7                     | 1000000                  | 1440                      | Stereotactic             | ketamine           |
| Cheng Y <sup>37</sup>  | 2015        | rat NSC             | Rat            | Transient MCAO                   | 18                    | 5000000                  | 1440                      | tail vein                | none               |

Abbreviation: NGF = Nerve Growth Factor, VEGF = Vascular Endothelial Growth Factor, EE = Enriched Environment, ST = Standard housing, hNT-3 = human neurotrophin-3, GDNF = Glial cell line-derived Neurotrophic Factor, Coll = Collagen type I, Wort = Wortmannin, BDNF = Brain-derived Neurotrophic Factor, TAT-HA = TAT-hemagglutinin, TAT-HS = TAT-heat shock protein 70, ic = intracranial injection, iv = intravenous injection, irrFCs = gamma-irradiated embryonic fibroblast cells, VPC = Vascular Progenitor cells, Y = young, A = aged, ESC = embryonic stem cell, ips = induced pluripotent stem cells.

**Supplementary Table 3 Outcome measures report**

| <b>Author</b> | <b>Year</b> | <b>Intervention</b> | <b>Structural Outcome</b> | <b>Functional Outcome</b> | <b>mNSS</b> | <b>Rotarod test</b> | <b>Cylinder test</b> |
|---------------|-------------|---------------------|---------------------------|---------------------------|-------------|---------------------|----------------------|
| Andsberg G    | 1998-1      | rat NSC             |                           | Neurobehavioural          | √           |                     |                      |
|               | 1998-2      | rat NGF-NSC         |                           | Neurobehavioural          | √           |                     |                      |
| Fukunaga A    | 2003        | rat NSC             |                           | Neurobehavioural          |             | √                   |                      |
| Chu K         | 2004        | human NSC           | Infarct Volume            | Neurobehavioural          |             | √                   |                      |
| Ishibashi S   | 2004        | human NSPC          | Infarct Volume            | Neurobehavioural          |             |                     |                      |
| Kelly S       | 2004        | human NSC           | Infarct Volume            |                           |             |                     |                      |
| Chu K         | 2005-1      | human NSC           | Infarct Volume            | Neurobehavioural          |             | √                   |                      |
|               | 2005-2      | hNSC-VEGF           | Infarct Volume            | Neurobehavioural          |             | √                   |                      |
| Zhu W         | 2005-1      | rat NSC             |                           | Neurobehavioural          | √           |                     |                      |
|               | 2005-2      | rat NSC-VEGF        |                           | Neurobehavioural          | √           |                     |                      |
| Hicks A       | 2007-1      | mouse NSC-ST        | Infarct Volume            | Neurobehavioural          |             |                     | √                    |
|               | 2007-2      | mouse NSC-EE        | Infarct Volume            | Neurobehavioural          |             |                     | √                    |
| Daadi M       | 2008        | human ESC-NSC       |                           | Neurobehavioural          |             |                     | √                    |
| Hicks A       | 2008-1      | mouse NSC-ST        | Infarct Volume            | Neurobehavioural          |             |                     | √                    |
|               | 2008-2      | mouse NSC-EE        | Infarct Volume            | Neurobehavioural          |             |                     | √                    |
| Mochizuki N   | 2008        | rat NPC             | Infarct Volume            | Neurobehavioural          | √           |                     |                      |
| Zhang Z       | 2008-1      | rat NSC             |                           | Neurobehavioural          | √           |                     |                      |
|               | 2008-2      | rat NSC-hNT3        |                           | Neurobehavioural          | √           |                     |                      |
| Bacigaluppi M | 2009        | mouse NSC           | Infarct Volume            | Neurobehavioural          | √           |                     |                      |
| Chen B        | 2009-1      | rat NSC             | Infarct Volume            | Neurobehavioural          | √           |                     |                      |
|               | 2009-2      | rat NSC-GDNF        | Infarct Volume            | Neurobehavioural          | √           |                     |                      |



| <b>Author</b> | <b>Year</b> | <b>Intervention</b> | <b>Structural Outcome</b> | <b>Functional Outcome</b> | <b>mNSS</b> | <b>Rotarod test</b> | <b>Cylinder test</b> |
|---------------|-------------|---------------------|---------------------------|---------------------------|-------------|---------------------|----------------------|
| Stroemer P    | 2009        | human NSC           | Infarct Volume            | Neurobehavioural          |             |                     |                      |
| Zhang P       | 2009        | human NSC           | Infarct Volume            | Neurobehavioural          | √           |                     |                      |
| Pan           | 2010        | human NSC           |                           | Neurobehavioural          | √           |                     |                      |
| Shen C        | 2010        | rat NSC             | Infarct Volume            | Neurobehavioural          |             |                     |                      |
| Yu H          | 2010-1      | rat NSC             |                           | Neurobehavioural          | √           |                     |                      |
|               | 2010-2      | rat NSC-coll        |                           | Neurobehavioural          | √           |                     |                      |
| Zhao Y        | 2010-1      | rat NSC             | Infarct Volume            | Neurobehavioural          | √           |                     |                      |
|               | 2010-2      | rat NSC-wort        | Infarct Volume            | Neurobehavioural          | √           |                     |                      |
| Andres R      | 2011        | human NSC           | Infarct Volume            | Neurobehavioural          |             |                     | √                    |
| Seyed J       | 2011        | rat NSC             |                           | Neurobehavioural          |             | √                   |                      |
| Song M        | 2011        | human NSC           | Infarct Volume            | Neurobehavioural          | √           |                     | √                    |
| Zhu J         | 2011-1      | rat NSC             |                           | Neurobehavioural          | √           |                     |                      |
|               | 2011-2      | rat NSC-BDNF        |                           | Neurobehavioural          | √           |                     |                      |
|               | 2012-1      | mouse NSC-ic        | Infarct Volume            | Neurobehavioural          |             | √                   |                      |
|               | 2012-2      | mouse NSC-ic-TAT-HA | Infarct Volume            | Neurobehavioural          |             | √                   |                      |
| Doeppner T    | 2012-3      | mouse NSC-ic-TAT-HS | Infarct Volume            | Neurobehavioural          |             | √                   |                      |
|               | 2012-4      | mouse NSC-iv        | Infarct Volume            | Neurobehavioural          |             | √                   |                      |
|               | 2012-5      | mouse NSC-iv-TAT-HA | Infarct Volume            | Neurobehavioural          |             | √                   |                      |
|               | 2012-6      | mouse NSC-ivTAT-HS  | Infarct Volume            | Neurobehavioural          |             | √                   |                      |
| Patkar S      | 2012        | mouse NSC           | Infarct Volume            | Neurobehavioural          |             |                     | √                    |
| Chang D J     | 2013-1      | hNSC-BDNF           |                           | Neurobehavioural          | √           | √                   |                      |
| Chang D J     | 2013-2      | hipsc-NPC           |                           | Neurobehavioural          | √           | √                   |                      |
| Chang D J     | 2013-3      | hESC-NPC            |                           | Neurobehavioural          | √           | √                   |                      |

| <b>Author</b> | <b>Year</b> | <b>Intervention</b> | <b>Structural Outcome</b> | <b>Functional Outcome</b> | <b>mNSS</b> | <b>Rotarod test</b> | <b>Cylinder test</b> |
|---------------|-------------|---------------------|---------------------------|---------------------------|-------------|---------------------|----------------------|
| Mine Y        | 2013        | human NPSC          |                           | Neurobehavioural          |             |                     | √                    |
| Yuan T        | 2013        | hipsc-NPC           |                           | Neurobehavioural          |             |                     |                      |
| Chau M J      | 2014        | mouse-ips-NPC       |                           | Neurobehavioural          |             |                     |                      |
| Chen L        | 2014        | rat NSC             | Infarct Volume            | Neurobehavioural          | √           |                     |                      |
| Huang L       | 2014        | human NSC           | Infarct Volume            | Neurobehavioural          |             | √                   |                      |
| Li J          | 2014-1      | mouse NSC-irrFCs    | Infarct Volume            | Neurobehavioural          | √           | √                   |                      |
|               | 2014-2      | mouse NSC-VPC       | Infarct Volume            | Neurobehavioural          | √           | √                   |                      |
| Tang Y        | 2014-1      | mice NSC            | Infarct Volume            | Neurobehavioural          | √           | √                   |                      |
|               | 2014-2      | mice NSC            | Infarct Volume            | Neurobehavioural          | √           | √                   |                      |
| Cheng Y       | 2015        | rat NSC             | Infarct Volume            | Neurobehavioural          | √           |                     |                      |

**Supplementary Table 4 Study Quality Report**

| <b>Author</b> | <b>Year</b> | <b>(1)</b> | <b>(2)</b> | <b>(3)</b> | <b>(4)</b> | <b>(5)</b> | <b>(6)</b> | <b>(7)</b> | <b>(8)</b> | <b>(9)</b> | <b>(10)</b> | <b>Quality Score</b> |
|---------------|-------------|------------|------------|------------|------------|------------|------------|------------|------------|------------|-------------|----------------------|
| Andsberg G    | 1998        | 1          | 1          | 1          | 1          | 1          | 1          | 0          | 0          | 0          | 0           | 6                    |
| Fukunaga A    | 2003        | 1          | 1          | 0          | 0          | 0          | 1          | 0          | 0          | 0          | 0           | 3                    |
| Chu K         | 2004        | 1          | 1          | 1          | 1          | 0          | 1          | 0          | 0          | 1          | 0           | 6                    |
| Ishibashi S   | 2004        | 1          | 0          | 1          | 0          | 1          | 1          | 0          | 0          | 1          | 0           | 5                    |
| Kelly S       | 2004        | 1          | 1          | 0          | 0          | 0          | 1          | 0          | 0          | 1          | 0           | 4                    |
| Chu K         | 2005        | 1          | 0          | 0          | 0          | 1          | 1          | 0          | 0          | 1          | 0           | 4                    |
| Zhu W         | 2005        | 1          | 1          | 0          | 0          | 1          | 1          | 0          | 0          | 1          | 0           | 5                    |
| Hicks A       | 2007        | 1          | 1          | 1          | 1          | 1          | 1          | 0          | 0          | 1          | 0           | 7                    |
| Daadi M       | 2008        | 1          | 0          | 0          | 0          | 0          | 1          | 0          | 0          | 1          | 0           | 3                    |
| Hicks A       | 2008        | 1          | 1          | 1          | 1          | 0          | 1          | 0          | 0          | 1          | 0           | 6                    |
| Mochizuki N   | 2008        | 1          | 0          | 0          | 0          | 0          | 1          | 0          | 0          | 1          | 0           | 3                    |
| Zhang Z       | 2008        | 1          | 1          | 1          | 1          | 1          | 1          | 0          | 0          | 1          | 0           | 7                    |
| Bacigaluppi M | 2009        | 1          | 1          | 1          | 1          | 0          | 1          | 0          | 0          | 1          | 0           | 6                    |
| Chen B        | 2009        | 1          | 1          | 0          | 0          | 1          | 1          | 0          | 0          | 1          | 0           | 5                    |
| Stroemer P    | 2009        | 1          | 1          | 0          | 0          | 1          | 1          | 0          | 0          | 1          | 0           | 5                    |
| Zhang P       | 2009        | 1          | 1          | 0          | 0          | 1          | 1          | 0          | 0          | 1          | 0           | 5                    |
| Pan           | 2010        | 1          | 0          | 1          | 1          | 0          | 0          | 0          | 0          | 1          | 0           | 4                    |
| Shen C        | 2010        | 1          | 1          | 1          | 1          | 0          | 1          | 0          | 0          | 1          | 0           | 6                    |
| Yu H          | 2010        | 1          | 1          | 1          | 1          | 1          | 1          | 0          | 0          | 1          | 0           | 7                    |
| Zhao Y        | 2010        | 1          | 0          | 1          | 1          | 0          | 1          | 0          | 0          | 1          | 1           | 6                    |
| Andres R      | 2011        | 1          | 0          | 0          | 0          | 1          | 1          | 0          | 0          | 1          | 0           | 4                    |
| Seyed J       | 2011        | 1          | 1          | 0          | 0          | 1          | 1          | 0          | 0          | 1          | 0           | 5                    |

| Author     | Year | (1) | (2) | (3) | (4) | (5) | (6) | (7) | (8) | (9) | (10) | Quality Score |
|------------|------|-----|-----|-----|-----|-----|-----|-----|-----|-----|------|---------------|
| Song M     | 2011 | 1   | 1   | 0   | 0   | 1   | 1   | 0   | 0   | 1   | 1    | 6             |
| Zhu J      | 2011 | 1   | 0   | 1   | 1   | 0   | 1   | 0   | 0   | 1   | 1    | 6             |
| Doepfner T | 2012 | 1   | 1   | 0   | 0   | 1   | 1   | 0   | 0   | 1   | 1    | 6             |
| Patkar S   | 2012 | 1   | 1   | 0   | 0   | 1   | 1   | 0   | 0   | 1   | 0    | 5             |
| Chang D J  | 2013 | 1   | 0   | 0   | 0   | 0   | 0   | 0   | 0   | 1   | 1    | 3             |
| Chang D J  | 2013 | 1   | 0   | 0   | 0   | 0   | 0   | 0   | 0   | 1   | 1    | 3             |
| Chang D J  | 2013 | 1   | 1   | 0   | 0   | 0   | 1   | 0   | 0   | 1   | 1    | 5             |
| Mine Y     | 2013 | 1   | 0   | 0   | 0   | 1   | 1   | 0   | 0   | 1   | 0    | 4             |
| Yuan T     | 2013 | 1   | 0   | 1   | 0   | 0   | 0   | 0   | 0   | 1   | 1    | 4             |
| Chau M J   | 2014 | 1   | 0   | 0   | 0   | 0   | 1   | 0   | 0   | 1   | 1    | 4             |
| Chen L     | 2014 | 1   | 0   | 1   | 0   | 1   | 1   | 0   | 0   | 1   | 0    | 5             |
| Huang L    | 2014 | 1   | 1   | 0   | 0   | 0   | 1   | 0   | 0   | 1   | 1    | 5             |
| Li J       | 2014 | 1   | 0   | 1   | 0   | 1   | 0   | 0   | 0   | 1   | 0    | 4             |
| Tang Y     | 2014 | 1   | 1   | 1   | 0   | 1   | 1   | 0   | 0   | 1   | 1    | 7             |
| Cheng Y    | 2015 | 1   | 1   | 1   | 0   | 1   | 1   | 0   | 0   | 1   | 1    | 7             |

**Study quality items:**

- (1) Publication in a peer-reviewed journal
- (2) Statement describing control of temperature
- (3) Statement of randomisation to treatment group
- (4) Statement of allocation concealment
- (5) Statement of blinded assessment of outcome

- (6) Avoidance of anaesthetics with known marked intrinsic neuroprotective properties
- (7) Use of animals with relevant co-morbidities
- (8) Statement of sample size calculation
- (9) Statement of compliance with animal welfare regulations
- (10) Statement of whether or not the authors had possible conflicts of interest

## References

1. Andsberg, G., Kokaia, Z., Bjorklund, A., Lindvall, O. & Martinez-Serrano, A. Amelioration of ischaemia-induced neuronal death in the rat striatum by NGF-secreting neural stem cells. *Eur J Neurosci* **10**, 2026-36 (1998).
2. Fukunaga, A., Kawase, T. & Uchida, K. Functional recovery after simultaneous transplantation with neuro-epithelial stem cells and adjacent mesenchymal tissues into infarcted rat brain. *Acta Neurochirurgica* **145**, 473-481 (2003).
3. Chu, K. et al. Human neural stem cells improve sensorimotor deficits in the adult rat brain with experimental focal ischemia. *Brain Res* **1016**, 145-53 (2004).
4. Ishibashi, S. et al. Human neural stem/progenitor cells, expanded in long-term neurosphere culture, promote functional recovery after focal ischemia in Mongolian gerbils. *J Neurosci Res* **78**, 215-23 (2004).
5. Kelly, S. et al. Transplanted human fetal neural stem cells survive, migrate, and differentiate in ischemic rat cerebral cortex. *Proc Natl Acad Sci U S A* **101**, 11839-44 (2004).
6. Chu, K. et al. Combined treatment of vascular endothelial growth factor and human neural stem cells in experimental focal cerebral ischemia. *Neurosci Res* **53**, 384-90 (2005).
7. Zhu, W. et al. Transplantation of vascular endothelial growth factor-transfected neural stem cells into the rat brain provides neuroprotection after transient focal cerebral ischemia. *Neurosurgery* **57**, 325-33; discussion 325-33 (2005).
8. Hicks, A.U. et al. Enriched environment enhances transplanted subventricular zone stem cell migration and functional recovery after stroke. *Neuroscience* **146**, 31-40 (2007).
9. Daadi, M.M., Maag, A.L. & Steinberg, G.K. Adherent self-renewable human embryonic stem cell-derived neural stem cell line: functional engraftment in experimental stroke model. *PLoS One* **3**, e1644 (2008).
10. Hicks, A.U., MacLellan, C.L., Chernenko, G.A. & Corbett, D. Long-term assessment of enriched housing and subventricular zone derived cell transplantation after focal ischemia in rats. *Brain Research* **1231**, 103-112 (2008).
11. Mochizuki, N. et al. Injection of neural progenitor cells improved learning and memory dysfunction after cerebral ischemia. *Exp Neurol* **211**, 194-202 (2008).
12. Zhang, Z.H. et al. Transplantation of neural stem cells modified by human neurotrophin-3 promotes functional recovery after transient focal cerebral ischemia in rats. *Neurosci Lett* **444**, 227-30 (2008).
13. Bacigaluppi, M. et al. Delayed post-ischaemic neuroprotection following systemic neural stem cell transplantation involves multiple mechanisms. *Brain* **132**, 2239-2251 (2009).
14. Chen, B. et al. Neuroprotective effect of grafting GDNF gene-modified neural stem cells on cerebral ischemia in rats. *Brain Res* **1284**, 1-11 (2009).
15. Stroemer, P. et al. The neural stem cell line CTX0E03 promotes behavioral recovery and endogenous neurogenesis after experimental stroke in a dose-dependent fashion. *Neurorehabil Neural Repair* **23**, 895-909 (2009).
16. Zhang, P. et al. Human neural stem cell transplantation attenuates apoptosis and improves neurological functions after cerebral ischemia in rats. *Acta Anaesthesiol Scand* **53**, 1184-91 (2009).
17. Pan, F. et al. Stem cell transplantation for treatment of cerebral ischemia in rats Effects of

- human umbilical cord blood stem cells and human neural stem cells. *Neural Regeneration Research* **5**, 485-490 (2010).
18. Shen, C.C. et al. Intravenous implanted neural stem cells migrate to injury site, reduce infarct volume, and improve behavior after cerebral ischemia. *Curr Neurovasc Res* **7**, 167-79 (2010).
  19. Yu, H. et al. Combined transplantation of neural stem cells and collagen type I promote functional recovery after cerebral ischemia in rats. *Anat Rec (Hoboken)* **293**, 911-7 (2010).
  20. Zhao, Y., Yao, S. & Wang, S. Neural stem cell transplantation in the hippocampus of rats with cerebral ischemia/reperfusion injury Activation of the phosphatidylinositol-3 kinase/Akt pathway and increased brain-derived neurotrophic factor expression. *Neural Regeneration Research* **5**, 1605-1610 (2010).
  21. Andres, R.H. et al. Human neural stem cells enhance structural plasticity and axonal transport in the ischaemic brain. *Brain* **134**, 1777-89 (2011).
  22. Seyed Jafari, S.S., Ali Aghaei, A., Asadi-Shekaari, M., Nematollahi-Mahani, S.N. & Sheibani, V. Investigating the effects of adult neural stem cell transplantation by lumbar puncture in transient cerebral ischemia. *Neurosci Lett* **495**, 1-5 (2011).
  23. Song, M. et al. Effects of duplicate administration of human neural stem cell after focal cerebral ischemia in the rat. *Int J Neurosci* **121**, 457-61 (2011).
  24. Zhu, J.M. et al. Functional recovery after transplantation of neural stem cells modified by brain-derived neurotrophic factor in rats with cerebral ischaemia. *J Int Med Res* **39**, 488-98 (2011).
  25. Doepfner, T.R. et al. Transduction of neural precursor cells with TAT-heat shock protein 70 chaperone: therapeutic potential against ischemic stroke after intrastriatal and systemic transplantation. *Stem Cells* **30**, 1297-310 (2012).
  26. Patkar, S., Tate, R., Mado, M., Plevin, R. & Carswell, H.V. Conditionally immortalised neural stem cells promote functional recovery and brain plasticity after transient focal cerebral ischaemia in mice. *Stem Cell Res* **8**, 14-25 (2012).
  27. Chang, D.J. et al. Therapeutic effect of BDNF-overexpressing human neural stem cells (HB1.F3.BDNF) in a rodent model of middle cerebral artery occlusion. *Cell Transplant* **22**, 1441-52 (2013).
  28. Chang, D.J. et al. Therapeutic potential of human induced pluripotent stem cells in experimental stroke. *Cell Transplant* **22**, 1427-40 (2013).
  29. Chang, D.J. et al. Contralaterally transplanted human embryonic stem cell-derived neural precursor cells (ENStem-A) migrate and improve brain functions in stroke-damaged rats. *Exp Mol Med* **45**, e53 (2013).
  30. Mine, Y. et al. Grafted human neural stem cells enhance several steps of endogenous neurogenesis and improve behavioral recovery after middle cerebral artery occlusion in rats. *Neurobiol Dis* **52**, 191-203 (2013).
  31. Yuan, T. et al. Human induced pluripotent stem cell-derived neural stem cells survive, migrate, differentiate, and improve neurologic function in a rat model of middle cerebral artery occlusion. *Stem Cell Res Ther* **4**, 73 (2013).
  32. Chau, M.J. et al. iPSC Transplantation increases regeneration and functional recovery after ischemic stroke in neonatal rats. *Stem Cells* **32**, 3075-87 (2014).
  33. Chen, L. et al. The role of exogenous neural stem cells transplantation in cerebral ischemic stroke. *J Biomed Nanotechnol* **10**, 3219-30 (2014).

34. Huang, L., Wong, S., Snyder, E.Y., Hamblin, M.H. & Lee, J.P. Human neural stem cells rapidly ameliorate symptomatic inflammation in early-stage ischemic-reperfusion cerebral injury. *Stem Cell Res Ther* **5**, 129 (2014).
35. Li, J. et al. Neurovascular recovery via co-transplanted neural and vascular progenitors leads to improved functional restoration after ischemic stroke in rats. *Stem Cell Reports* **3**, 101-114 (2014).
36. Tang, Y. et al. Neural stem cell protects aged rat brain from ischemia-reperfusion injury through neurogenesis and angiogenesis. *J Cereb Blood Flow Metab* **34**, 1138-47 (2014).
37. Cheng, Y. et al. Intravenously delivered neural stem cells migrate into ischemic brain, differentiate and improve functional recovery after transient ischemic stroke in adult rats. *Int J Clin Exp Pathol* **8**, 2928-36 (2015).
